# Supplementary material for: Black soybean seed coat polyphenols have different effects on glucose and lipid metabolism in growing and young adult mice
Source: Royal Society of Chemistry journal article supplement (doi:10.1039/d3fo04269c), 2023-12-21
Supplement: d3fo04269c1.pdf [file d3fo04269c1.pdf]

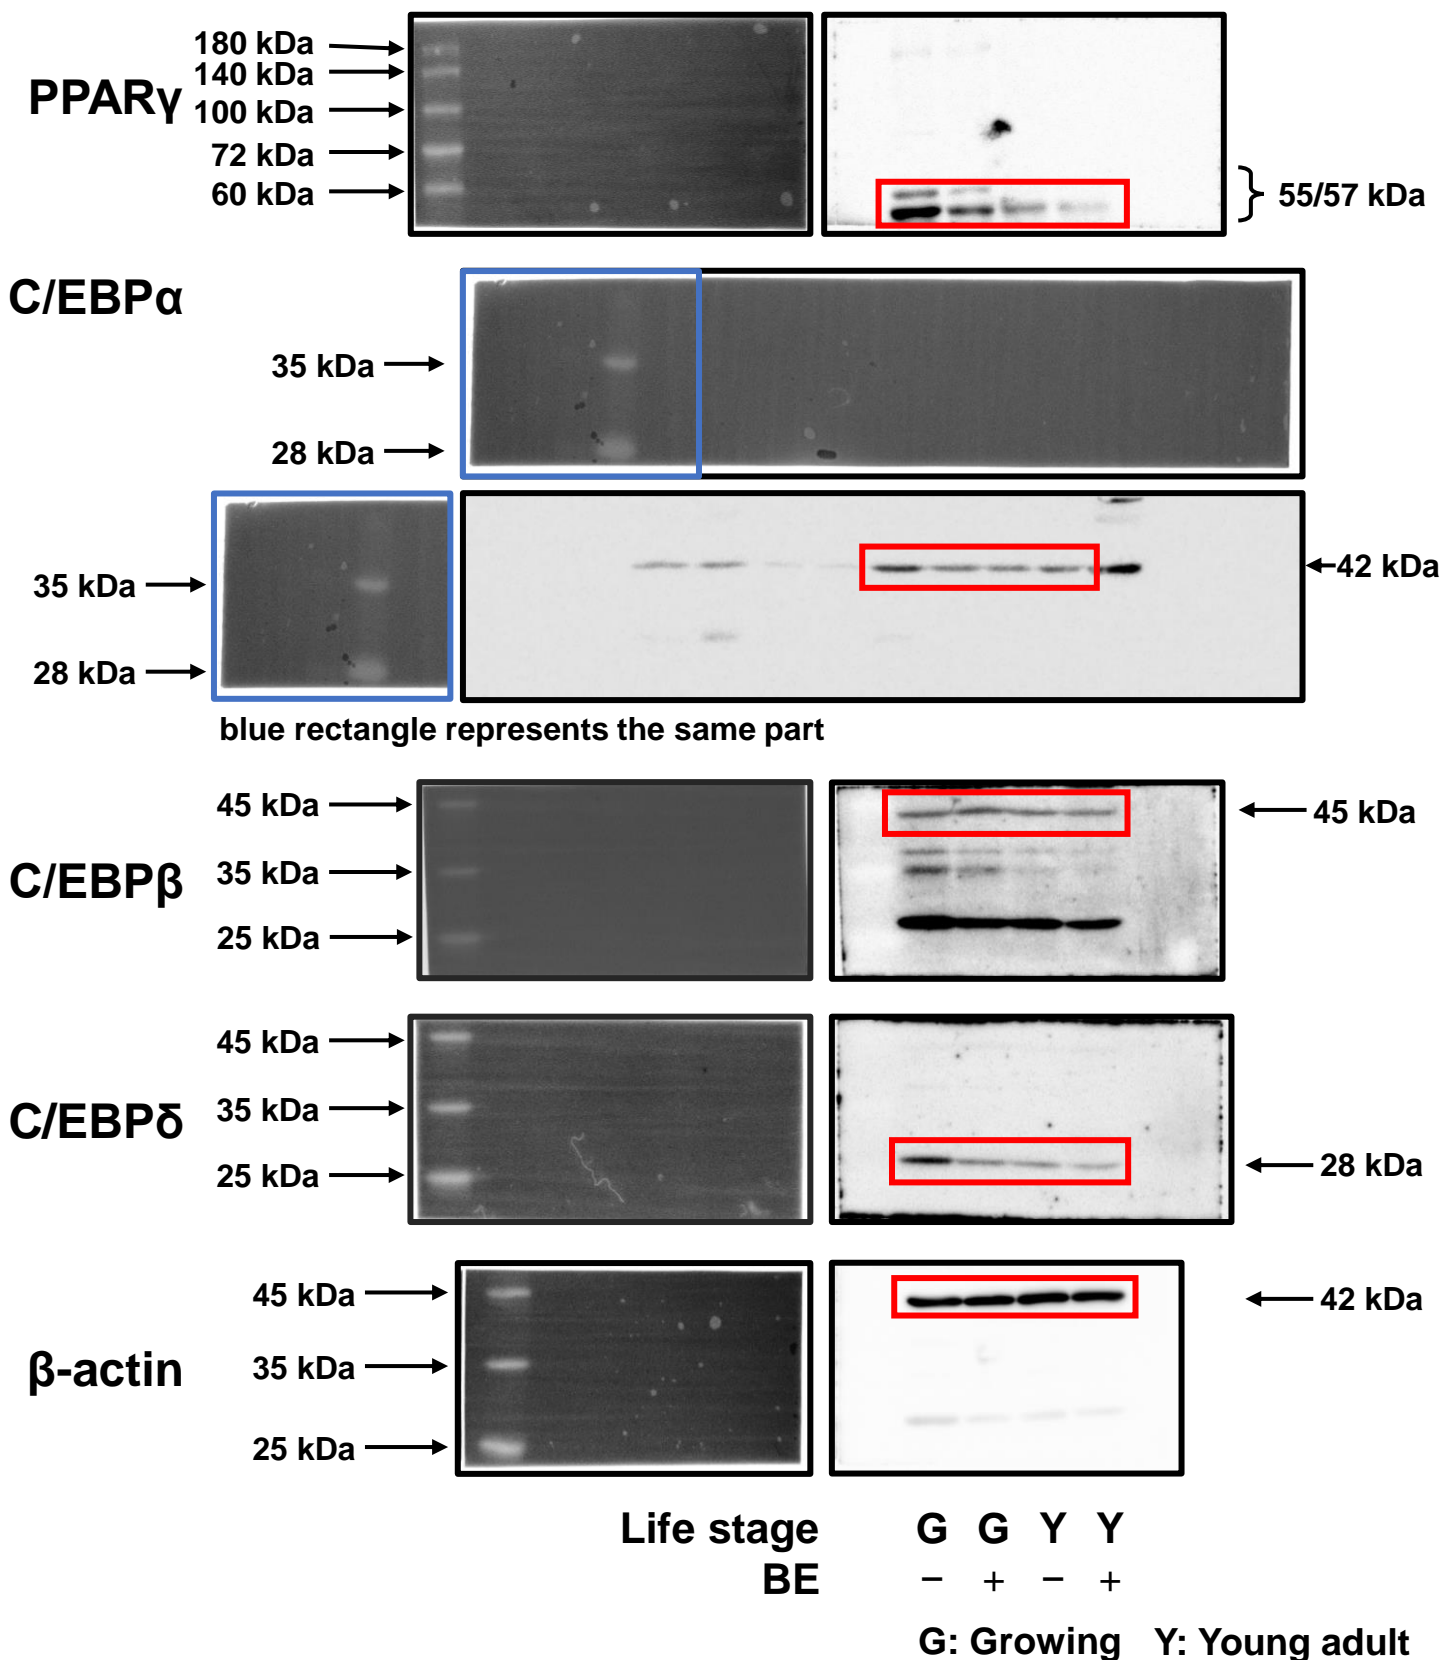

Supplementary Figure.1 (supporting data for Figure.7)

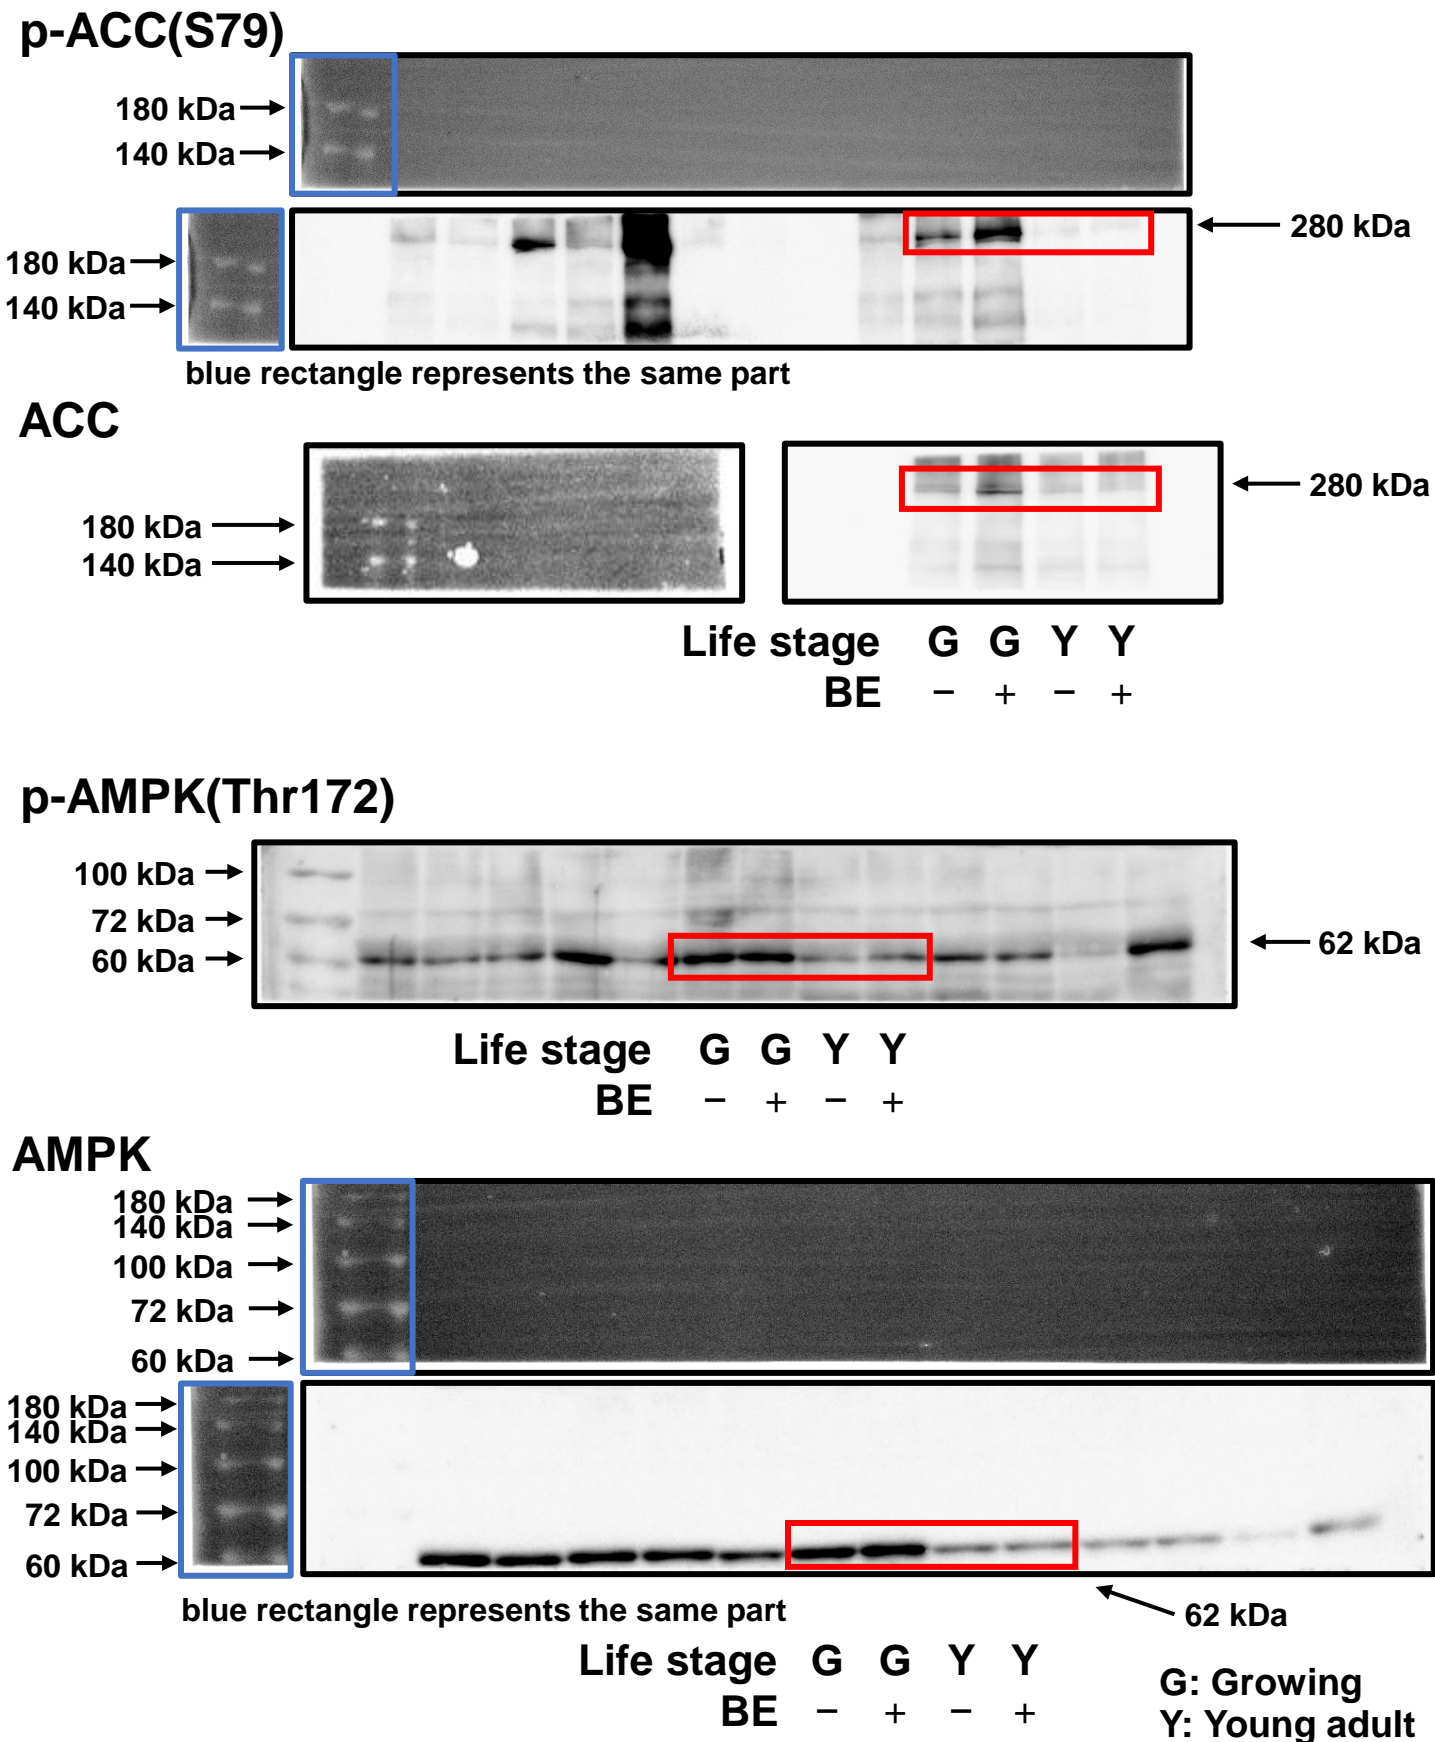

Supplementary Figure.2A (supporting data for Figure.9)

# FAS

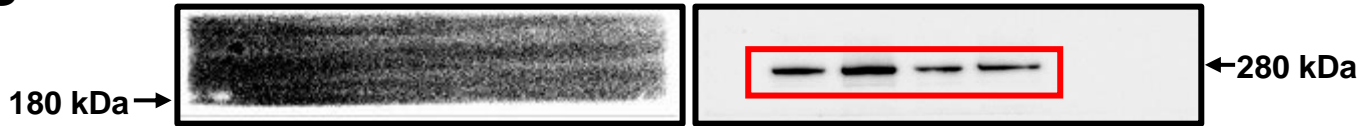

# CPT-1A

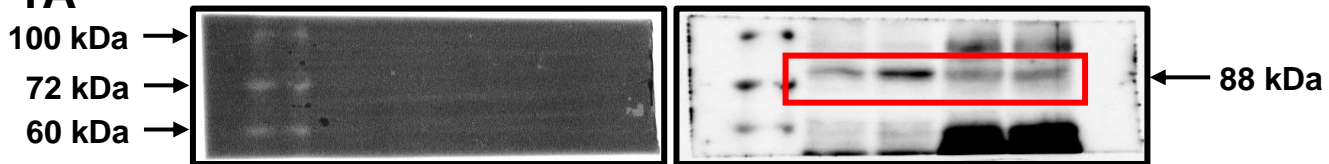

# UCP-2

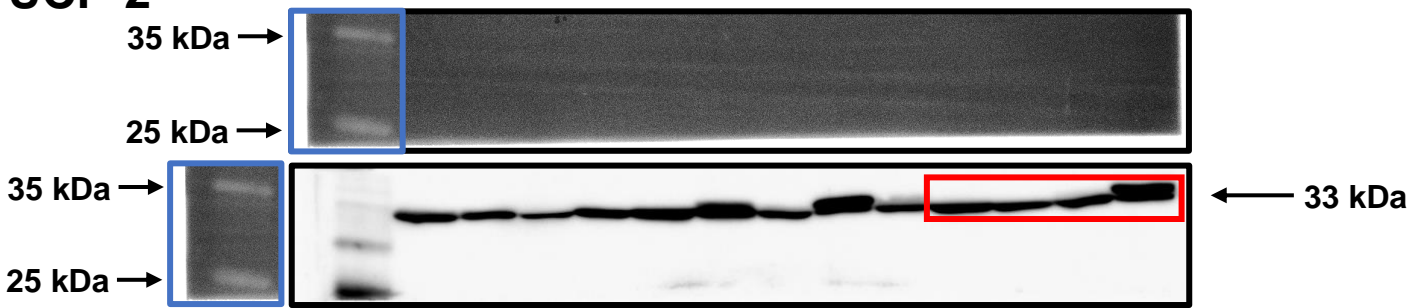

blue rectangle represents the same part

# β-actin

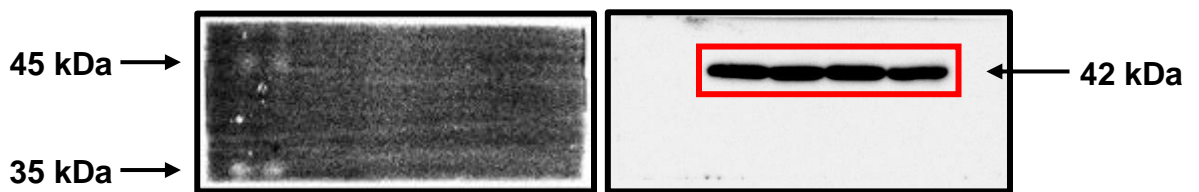

Life stage  
BE

G G Y Y  
- + - +

G: Growing  
Y: Young adult

Supplementary Figure.2B (supporting data for Figure.9)

# FAS

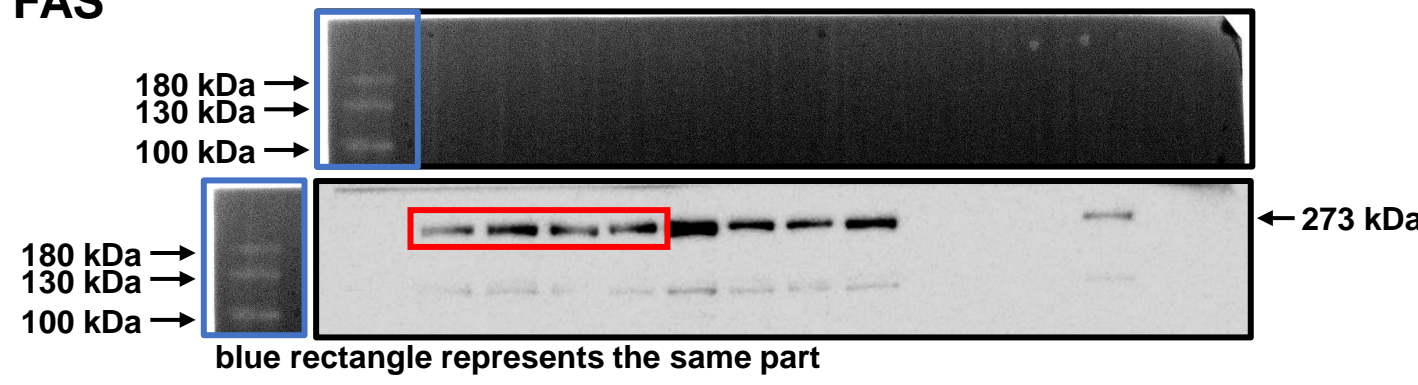

# ACC

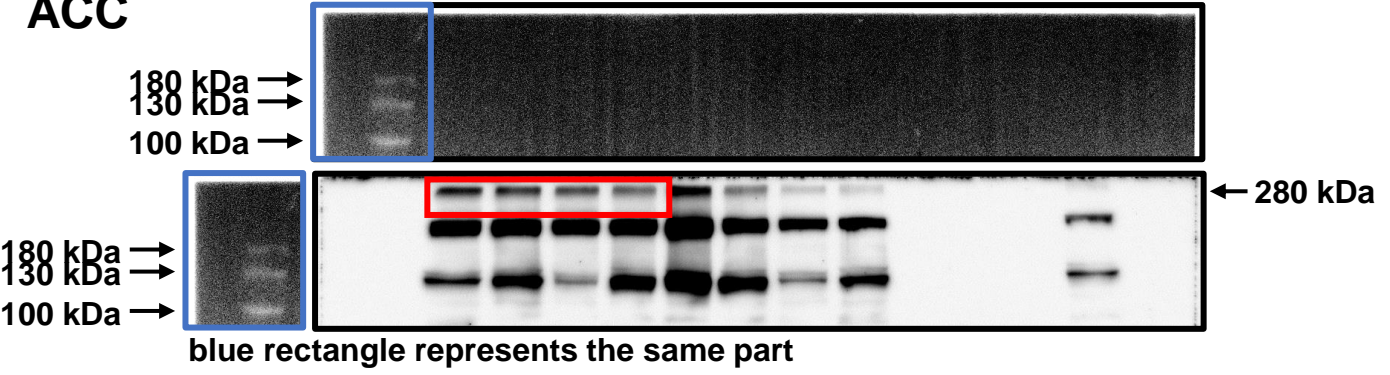

|            |   |   |   |   |
|------------|---|---|---|---|
| Life stage | G | G | Y | Y |
| BE         | - | + | - | + |

# precursor SREBP-1

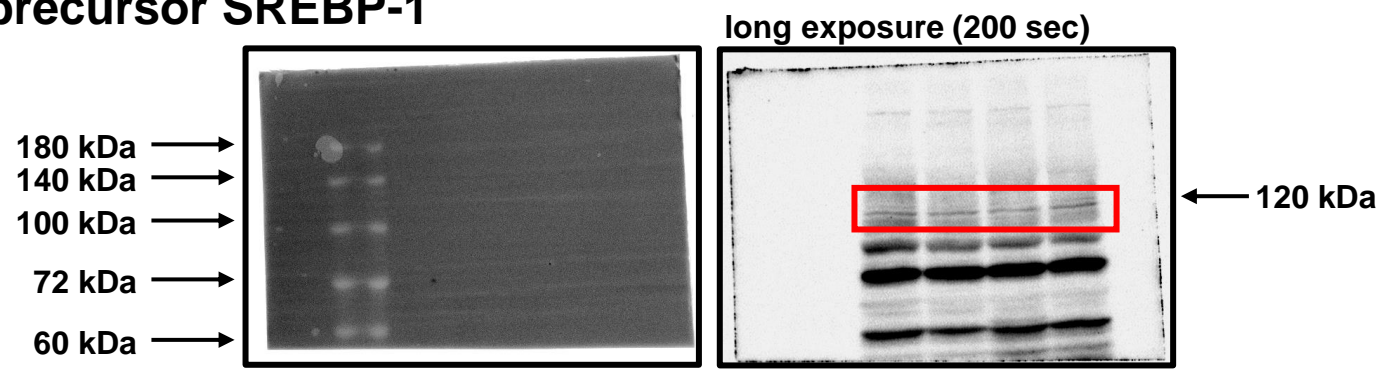

# cleaved SREBP-1

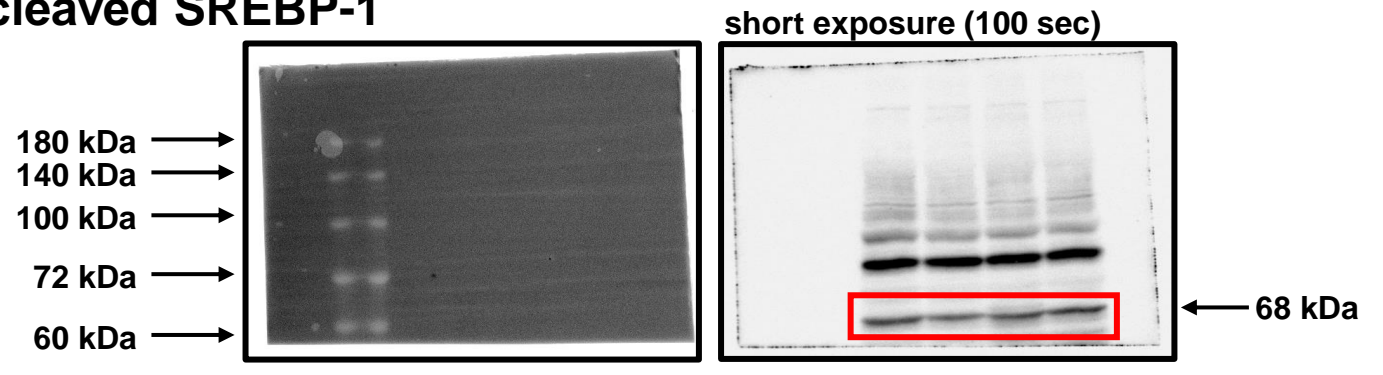

|            |   |   |   |   |                |
|------------|---|---|---|---|----------------|
| Life stage | G | G | Y | Y | G: Growing     |
| BE         | - | + | - | + | Y: Young adult |

Supplementary Figure.3A (supporting data for Figure.10)

## PPAR $\alpha$

72 kDa →  
60 kDa →  
45 kDa →

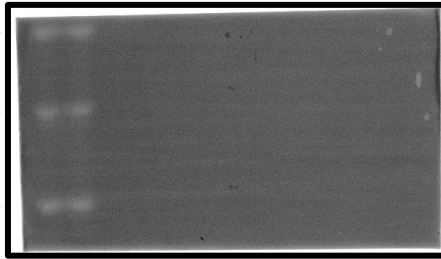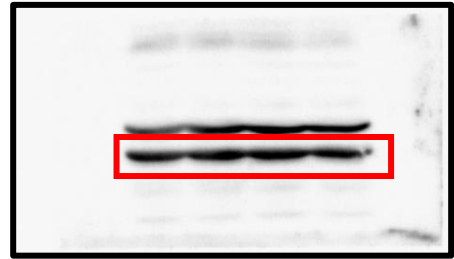

← 55 kDa

## CPT-1A

180 kDa →  
140 kDa →  
100 kDa →  
72 kDa →

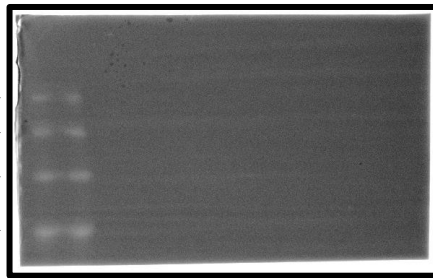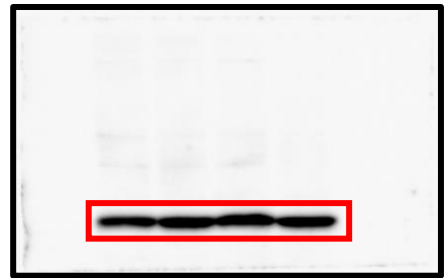

← 88 kDa

## GAPDH

45 kDa →  
35 kDa →

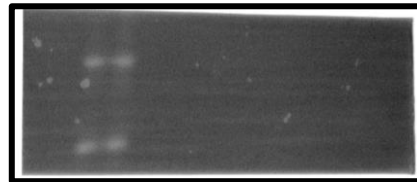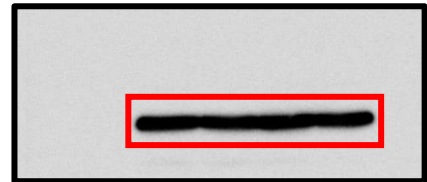

← 37 kDa

Life stage  
BE

G G Y Y  
- + - +

G: Growing Y: Young adult

Supplementary Figure.3B (supporting data for Figure.10)

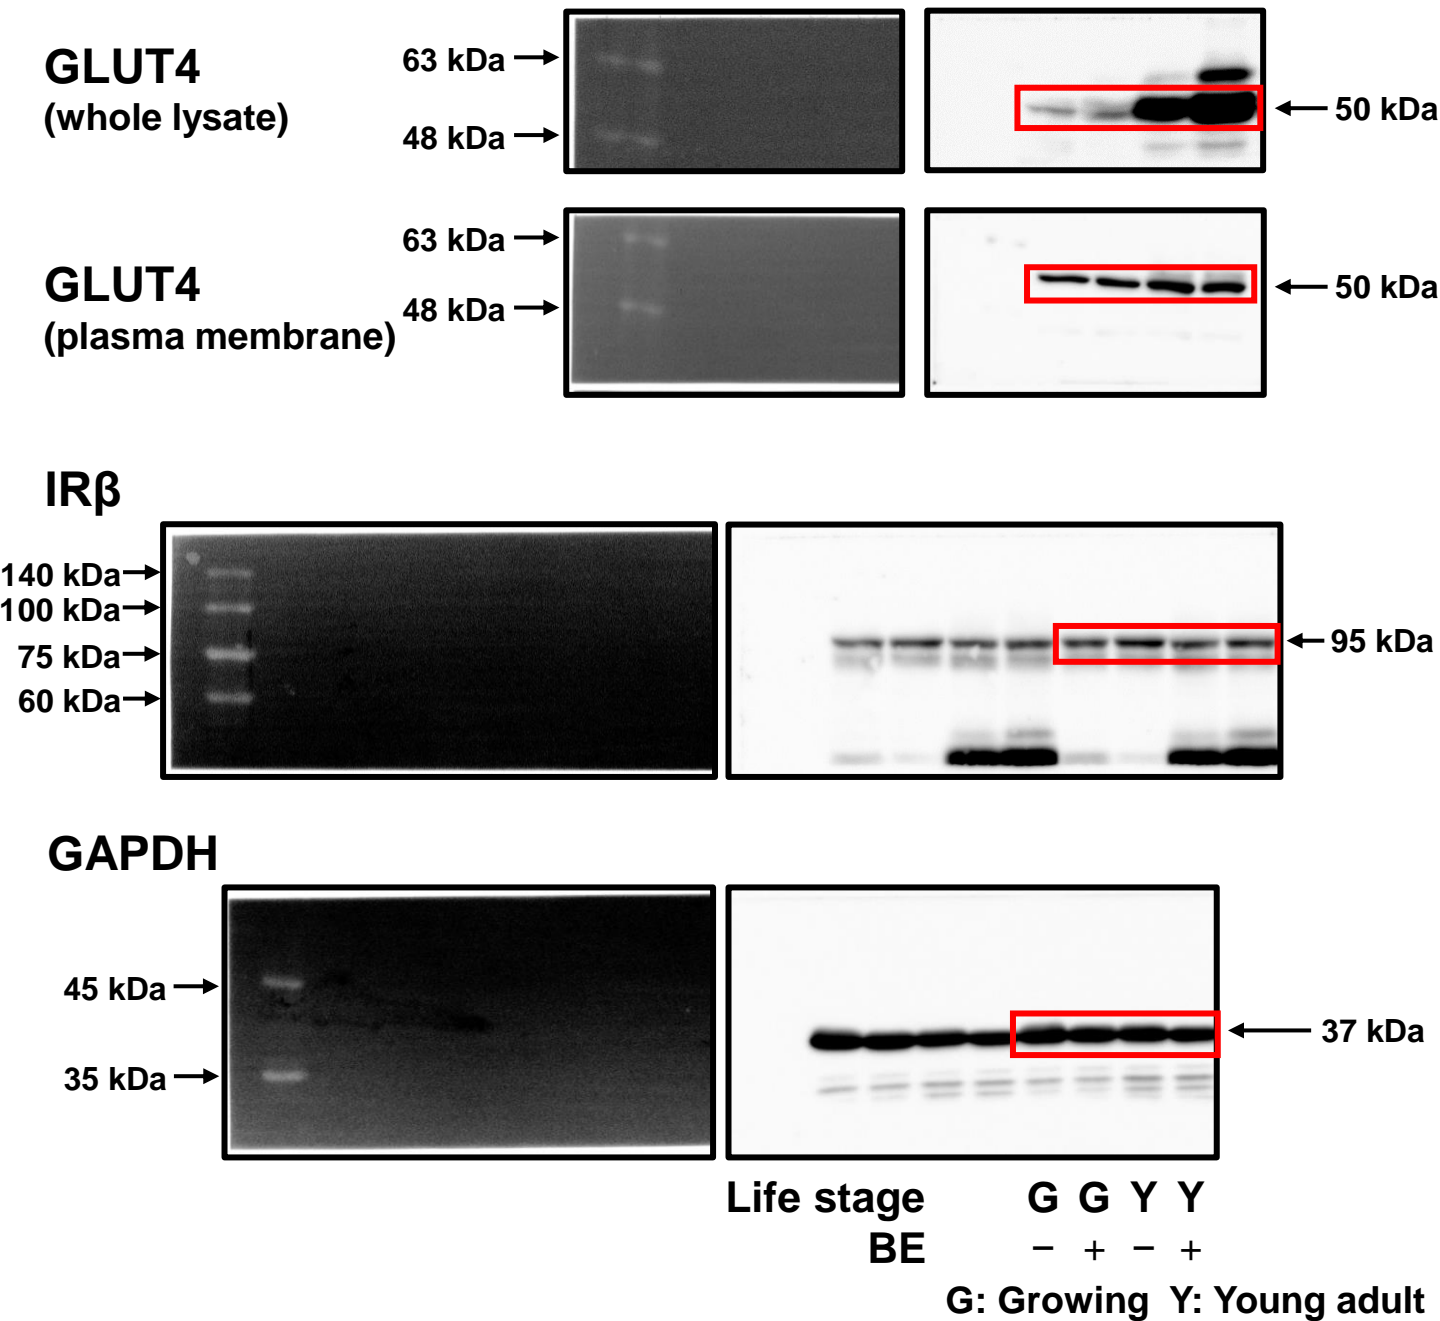

Supplementary Figure.4A (supporting data for Figure.13A)

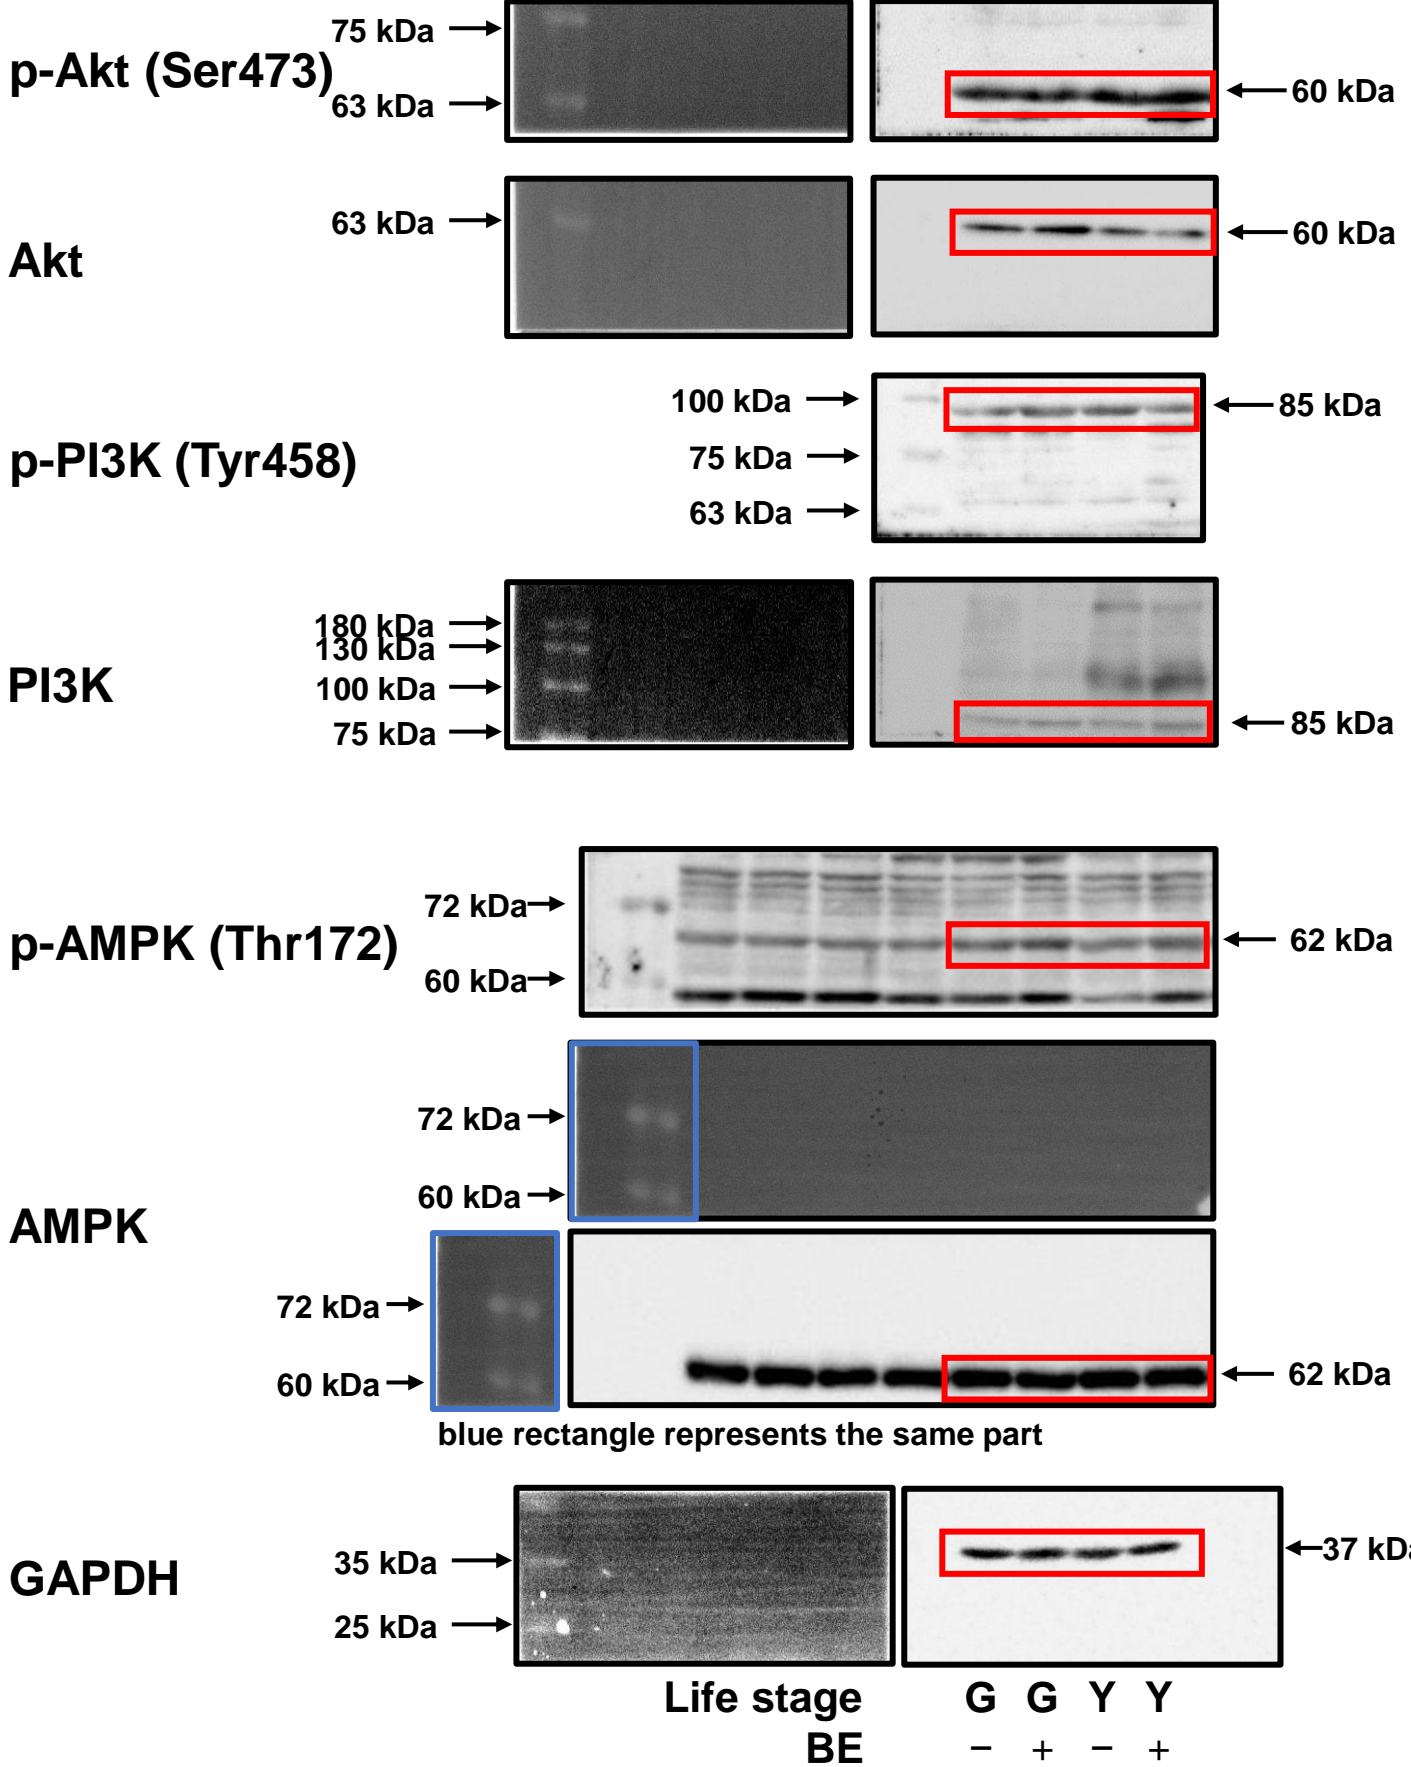

G: Growing Y: Young adult  
 Supplementary Figure.4B (supporting data for Figure.13B)
